# Supplementary material for: Genome-wide RNA-seq analysis indicates that the DAG1 transcription factor promotes hypocotyl elongation acting on ABA, ethylene and auxin signaling
Source: PubMed Central journal article supplement (PMC6203721; doi:10.1038/s41598-018-34256-3), 2018-10-26
Supplement: 41598_2018_34256_MOESM1_ESM.pdf [file 41598_2018_34256_MOESM1_ESM.pdf]

**Genome-wide RNA-seq analysis indicates that the DAG1 transcription factor promotes hypocotyl elongation acting on ABA, ethylene and auxin signalling**

Lorrai Riccardo<sup>1</sup>, Gandolfi Francesco<sup>2</sup>, Boccaccini Alessandra<sup>1</sup>, Ruta Veronica<sup>1</sup>, Possenti Marco<sup>3</sup>, Tramontano Anna<sup>2</sup>, Costantino Paolo<sup>1</sup>, Lepore Rosalba<sup>2\*</sup>, Vittorioso Paola<sup>1\*</sup>

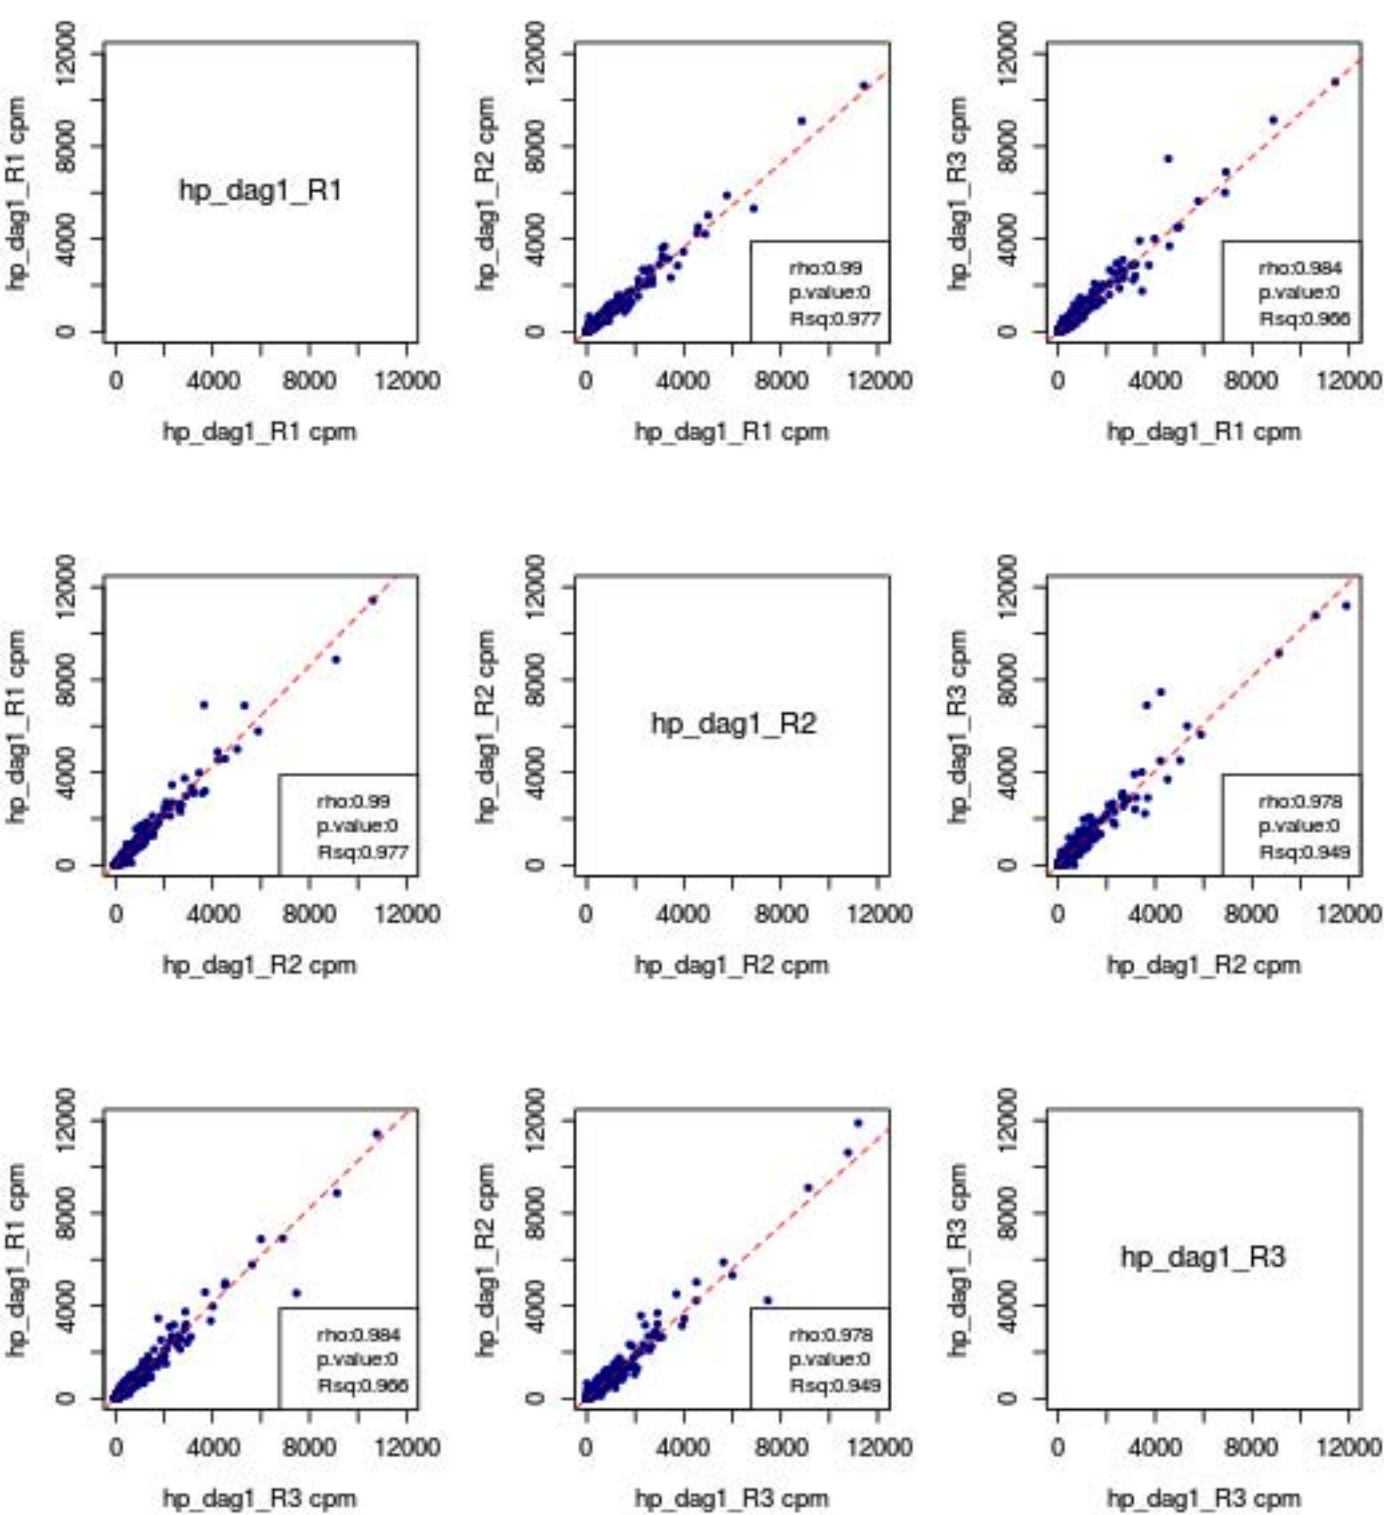

**Supplementary Fig S1.** Scatter plots of CPM values between replicates and Spearman's correlation coefficients.

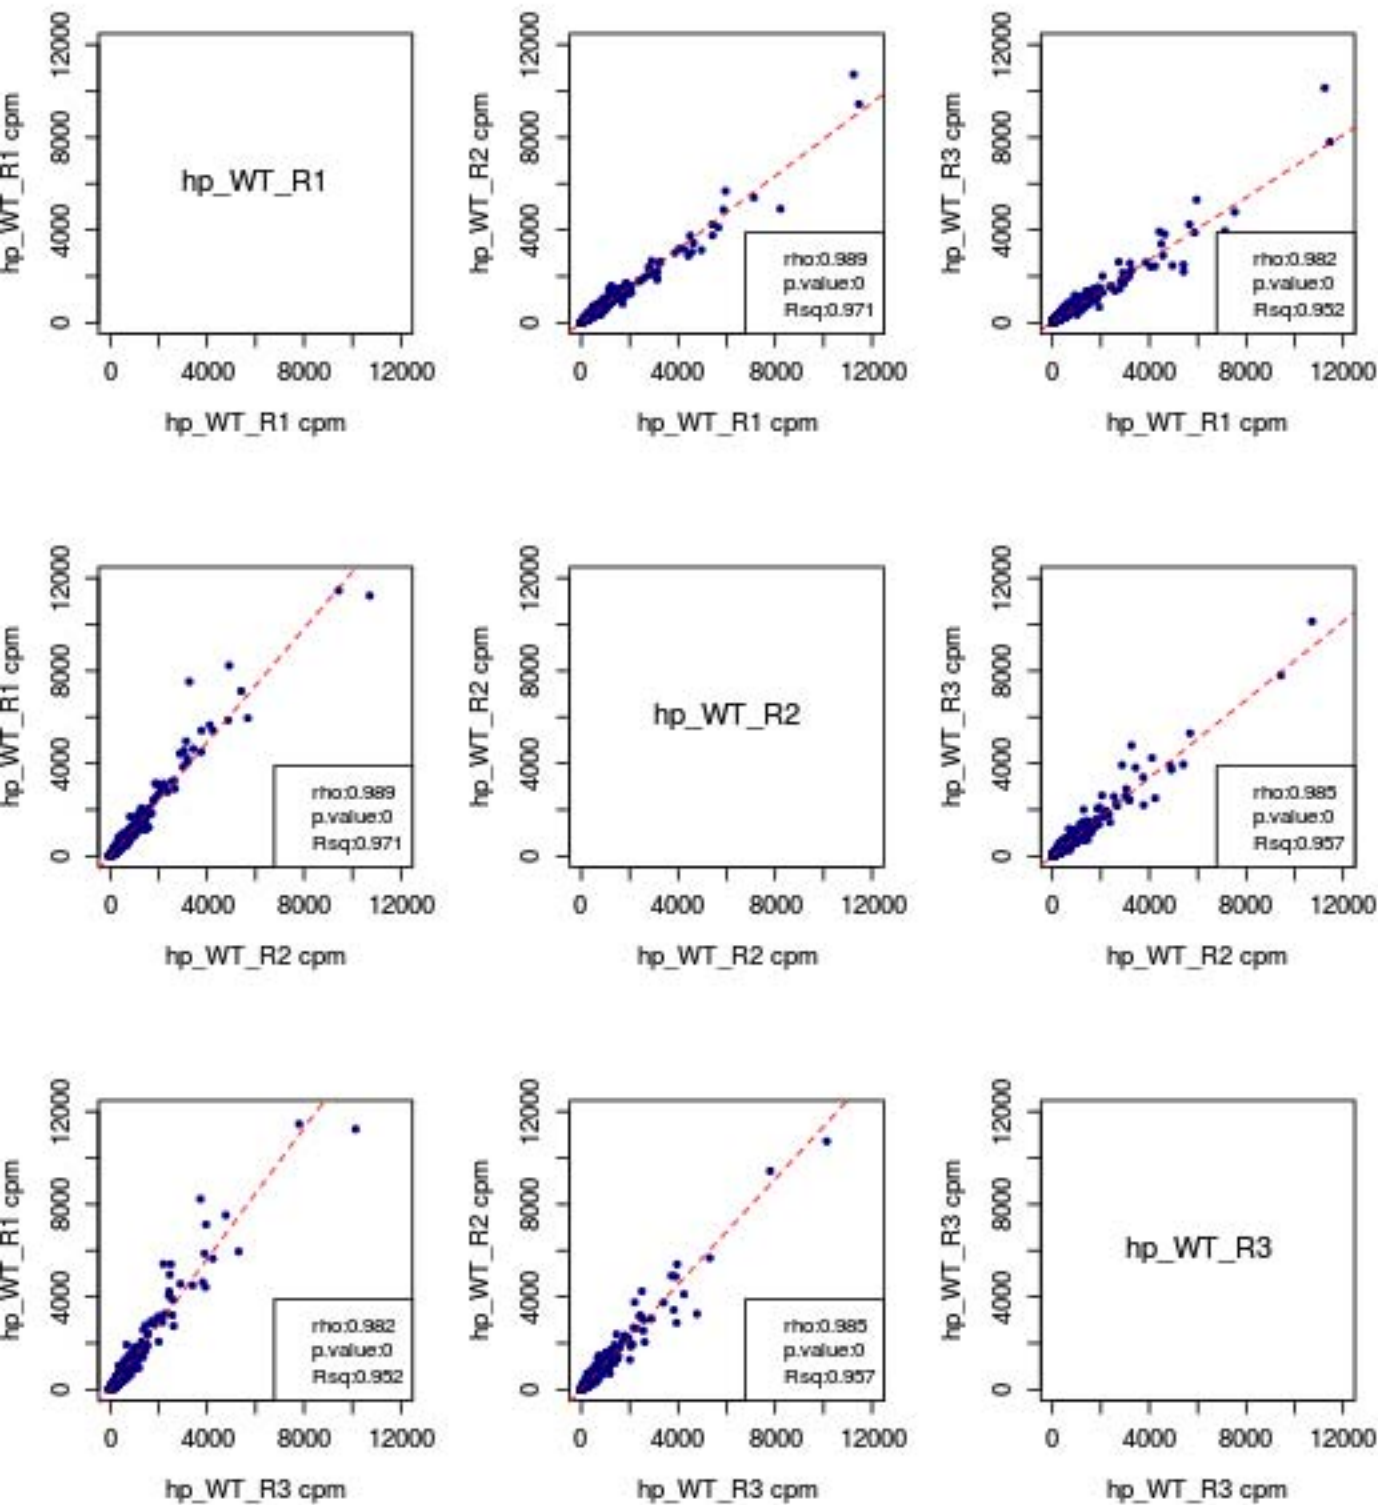

**Supplementary Fig S2.** Scatter plots of CPM values between replicates and Spearman's correlation coefficients.

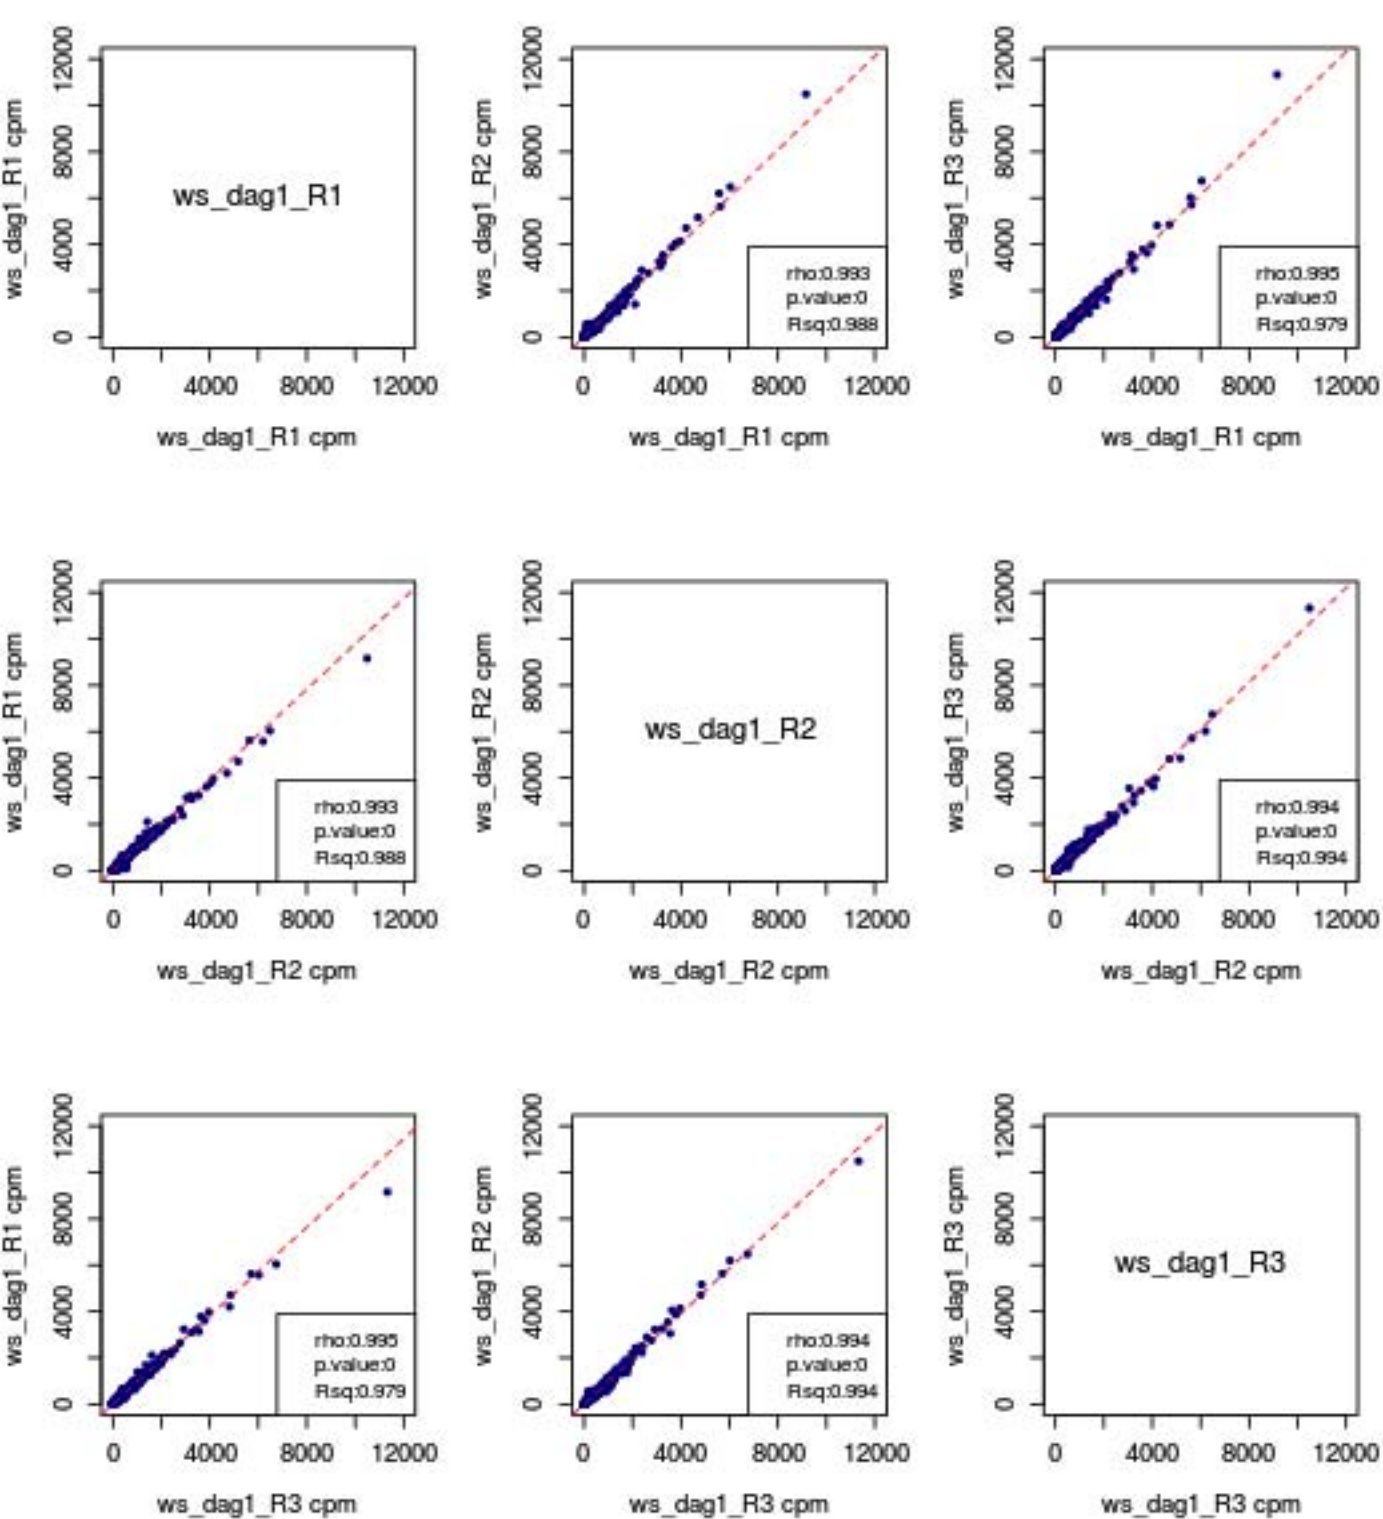

**Supplementary Fig S3.** Scatter plots of CPM values between replicates and Spearman's correlation coefficients.

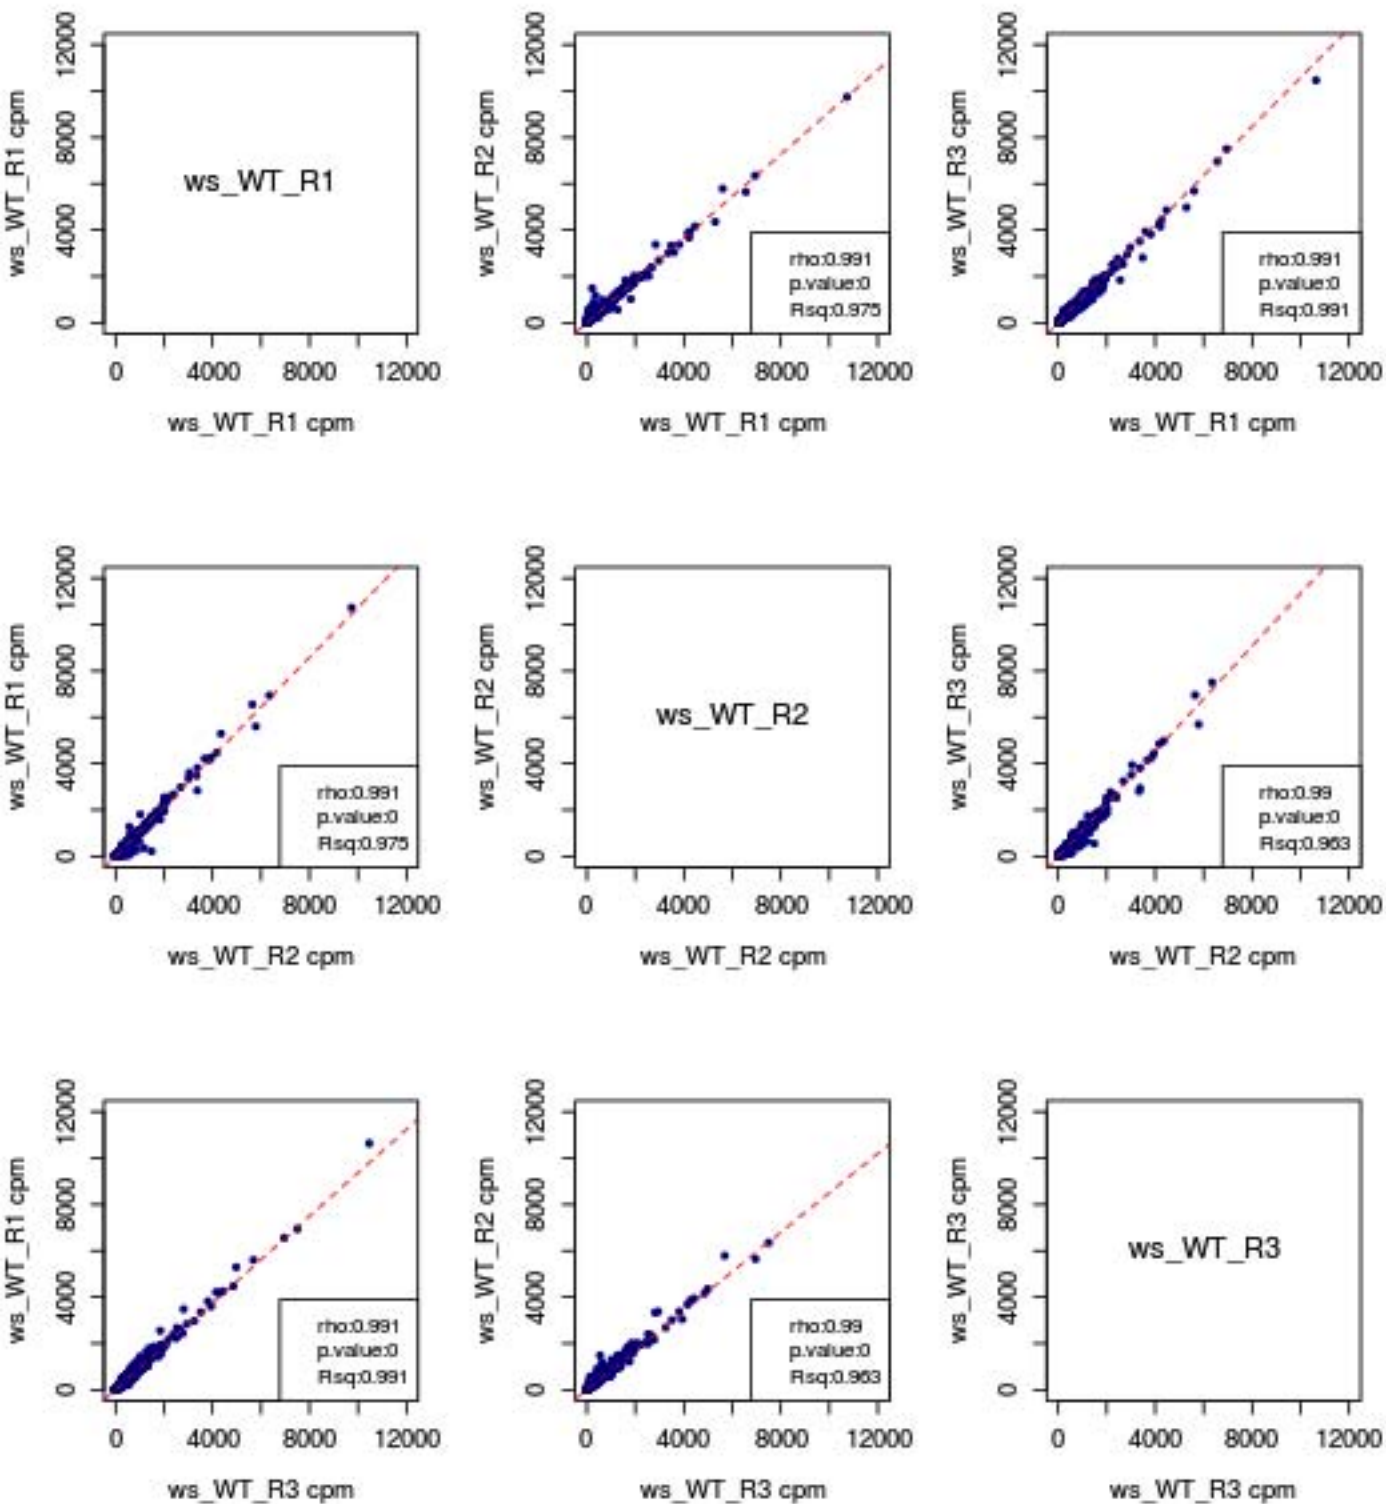

**Supplementary Fig S4.** Scatter plots of CPM values between replicates and Spearman's correlation coefficients.

**a**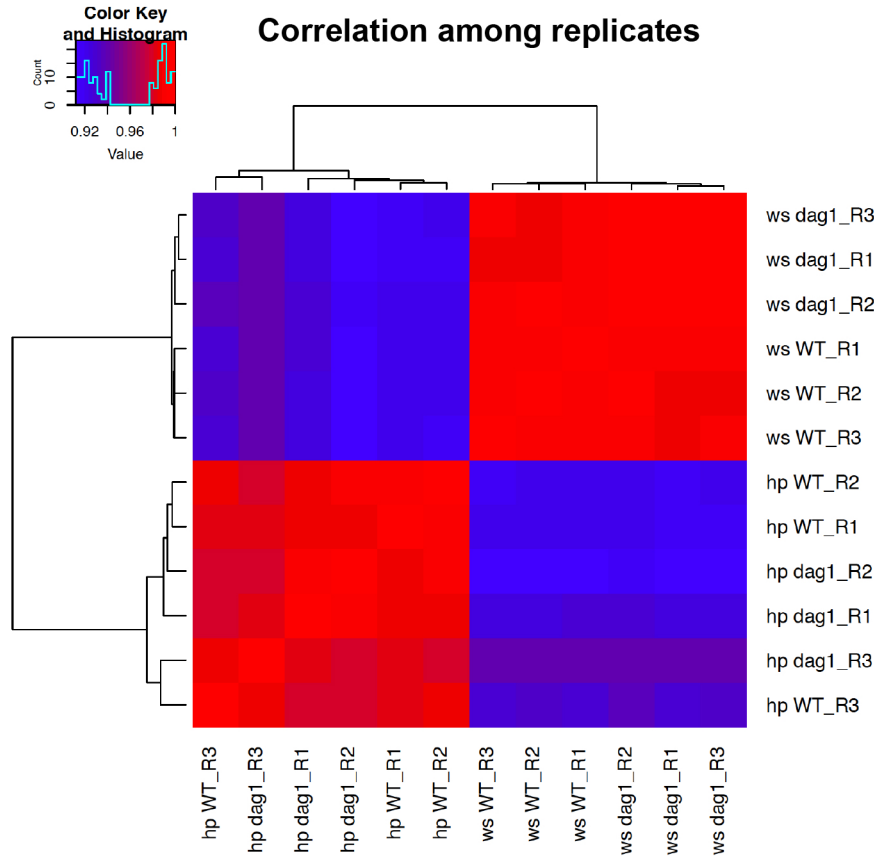**b**

### Principal Component Analysis of sample replicates

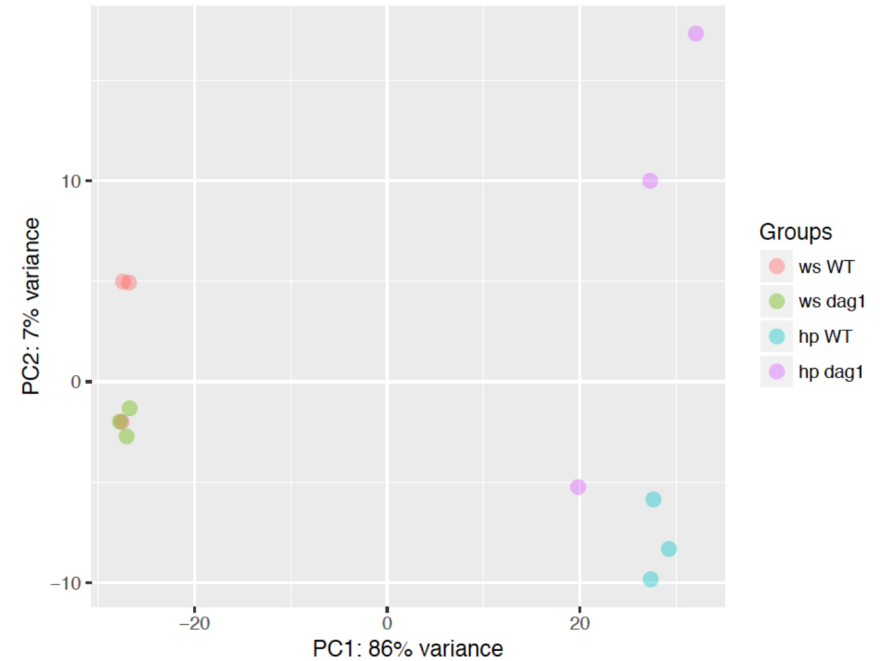

**Supplementary Fig S5. Sample clustering and Principal Component Analysis of RNA-seq data. (a)** Correlation clustering of RNA-seq replicates according to normalized gene expression values. Spearman correlation was used as a distance metric (defined as  $1 - \text{Spearman's correlation coefficient}$ ) and the “average” method as linkage function. **(b)** Principal Component Analysis (PCA) was performed using the ‘plotPCA’ function provided within the ‘DESeq2’ (v1.18) Bioconductor R package.



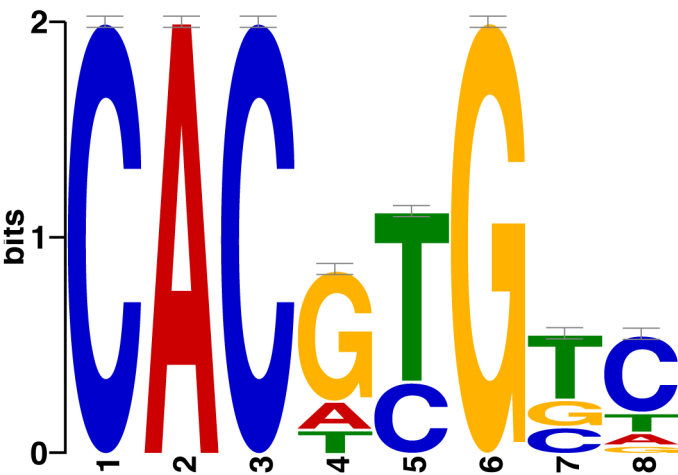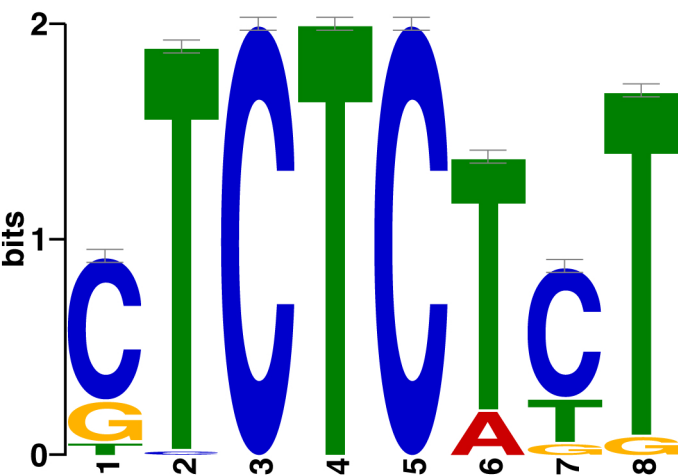

**Supplementary Fig S6.** The PIF binding motif is enriched in DE genes. Hidden Markov model sequence logos obtained using MEME<sup>1</sup>/TOMTOM<sup>2</sup> for significantly enriched motifs found in DE genes promoter sequences.

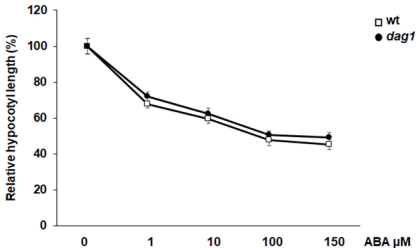

**Supplementary Fig S7.** Relative hypocotyl length of *dag1* (black) and wild type (white bar) seedlings grown under red light for five days, with increasing concentration of ABA (0, 1, 10, 100 and 150  $\mu\text{M}$ ). The values, normalised to mock treated samples for both genotypes, are the mean of three biological replicates, presented with SD values.



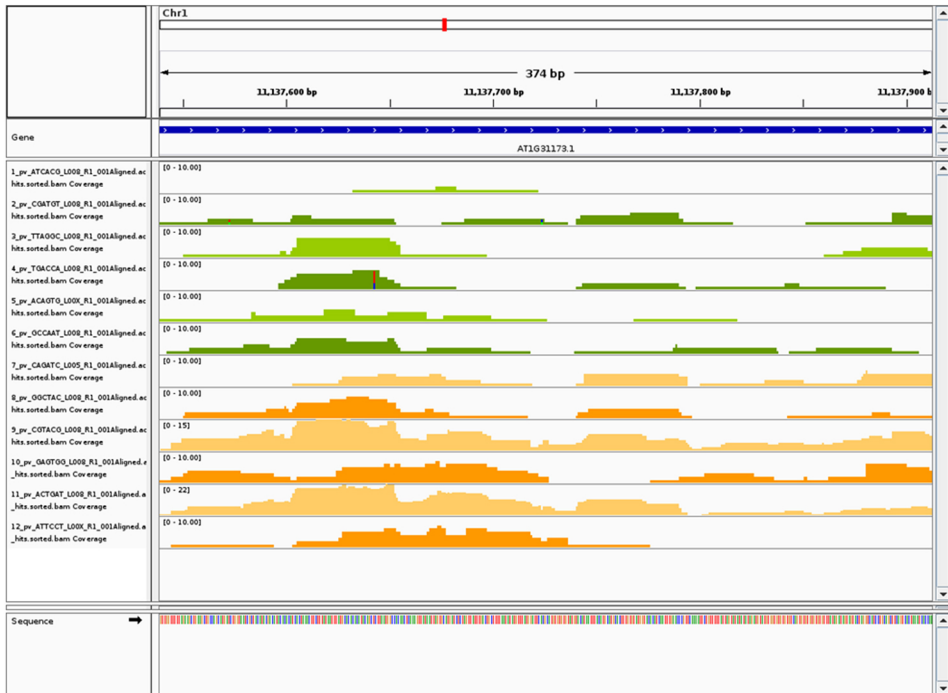

**Supplementary Fig S8.** Relative sequence read abundance of *miR167D* (Integrative Genome Browser view) as histograms, in *dag1* and wild type hypocotyls and seedlings. The Y-axis indicates read depth with the same scale for all samples (three biological replicates). The green profiles are referred to the whole seedlings, whereas the orange profiles are referred to the hypocotyls (*dag1* in dark green/orange, wild type in light green/orange). The *miR167* locus is shown by the blue track in the top panel.

**Supplementary Table S1.** Reads mapped to the *Arabidopsis thaliana* genome (TAIR10)

| Sample               | Tot Reads | % Uniquely mapped | % Multi Mapped | % Unmapped |
|----------------------|-----------|-------------------|----------------|------------|
| WT 1 (ws)            | 18967605  | 92                | 7,25           | 0,75       |
| <i>dagl</i> 1 (ws)   | 27654782  | 91                | 7,9            | 1,08       |
| WT 1.2 (ws)          | 25388619  | 91,25             | 7,88           | 0,87       |
| <i>dagl</i> 1.2 (ws) | 29184780  | 91,06             | 7,74           | 1,2        |
| WT 1.3 (ws)          | 21427524  | 91,98             | 6,96           | 1,05       |
| <i>dagl</i> 1.3 (ws) | 24563037  | 91,92             | 6,84           | 1,24       |
| WT 1 (hp)            | 19885967  | 90,04             | 5,82           | 4,05       |
| <i>dagl</i> 1 (hp)   | 19617630  | 92,35             | 6,24           | 1,4        |
| WT 1.2 (hp)          | 31727863  | 93,48             | 5,42           | 1,1        |
| <i>dagl</i> 1.2 (hp) | 31503405  | 93,22             | 5,43           | 1,36       |
| WT 1.3 (hp)          | 24355880  | 92,7              | 6,52           | 0,78       |
| <i>dagl</i> 1.3 (hp) | 20956766  | 92,72             | 5,8            | 1,47       |

**Supplementary Table S3.** List of the seed-specific genes differentially expressed in *dag1* hypocotyls respect to wild-type.

| <b>Name</b>  | <b>Locus</b> | <b>Function</b>       |
|--------------|--------------|-----------------------|
| <i>EM6</i>   | AT2g40170    | LEA                   |
| <i>LEA18</i> | AT2g35300    | LEA                   |
| <i>M10</i>   | AT2g41280    | LEA                   |
| <i>M17</i>   | AT2g41260    | LEA                   |
|              | AT2g23110    | LEA                   |
|              | AT3g17520    | LEA                   |
|              | AT3g53040    | LEA                   |
| <i>CRA1</i>  | AT5g44120    | seed storage proteins |
| <i>PAP85</i> | AT3g22640    | seed storage proteins |
| <i>SESA5</i> | AT5g54740    | seed storage proteins |

### Supplemental Table 3.

#### Specific primer sets used in the qRT-PCR:

|                  | Forward                    | Reverse                    |
|------------------|----------------------------|----------------------------|
| <i>UBQ10</i>     | GGCCTTGTATAATCCTGATGAATAAG | GGCCTTGTATAATCCTGATGAATAAG |
| <i>RAB18</i>     | CGATGGGCGGCATGGGAT         | CACCACCGGGAAGCTTTTCCTT     |
| <i>ABR1</i>      | TCCGTTGCGTTTCGGTCACA       | CTGATTCTGGTGGCGGCTGAA      |
| <i>AT2G23110</i> | ACCGATGCTCCCCTCCTTCA       | CGGAACGCCCTGACGGTT         |
| <i>LEA18</i>     | CTAAGGAGGCGCAGGCCAAA       | CTCGGGTAGGGTAGGTGGAGTG     |
| <i>EM6</i>       | GGAGCCGAGGAGGGCAAAC        | CTCAGCGTGTCCCCACCAG        |
| <i>M17</i>       | TGGTGGTTGTAGGTGGGGATGTT    | CAACAGTTTCCACAACCTCGTTTGC  |
| <i>M10</i>       | TGGTGGTGGTTGTAGGTTCCGGA    | CTTCGTTGGCCTCGGCTTGA       |
| <i>AT3G17520</i> | CGAAAGATAAGGCGTCGCAGAGTT   | GCTCAGCATCATCGTCGGTCAA     |
| <i>AT3G53040</i> | GCCCATGGAGACGAGAGCAC       | CCGCCTCTTTCAGTACCGTCG      |
| <i>CRA1</i>      | GGTGGTGAAACGCGCAACAA       | GACTGAGGTTCGTCCCGC         |
| <i>WRKY6</i>     | TCTCGGGGCTGCAGTTCTCT       | GGTCAGCTGTGAGTGCCGTT       |
| <i>WRKY18</i>    | GGGATGCTACAAGCCAGGGTG      | TCCCTTTCGTTTTTCTCCAACGCT   |
| <i>WRKY28</i>    | GCAGACCTCATGACTCCAAGAAGC   | ATAATCCAAAGCCGCCGCCA       |
| <i>WRKY33</i>    | ACCATCGGTTGTCCAGTGAGGA     | AACCGCTACCACGAGCTGC        |
| <i>WRKY40</i>    | GCTTGACTGTGCCGGTGACT       | GGAAGAAGCCATTTGCTCCACCA    |
| <i>WRKY46</i>    | CTGCACCTGCTGCTGTTGAGAA     | CGACCACAACCAATCCTGTCCG     |
| <i>WRKY70</i>    | CAGGCCAGTTACGTCAATGGGAAAA  | GAAATCGCCGCCACCTCCA        |
| <i>SAUR50</i>    | GAGATGGTTAAAGAAGAAGCGG     | CCTAGATGGGCTTAAAAATAAAGG   |
| <i>SAUR63</i>    | TGTAGTACTACGCAACAGTTGC     | GAAATGATCTGTCTATCTAATCCAC  |
| <i>SAUR65</i>    | CCACAAGAACAACAGAGTGGTT     | ACAGAGGAAAAAATGTCTACTC     |
| <i>SAUR67</i>    | CAGAAAAGGCTCTGTTGATGTC     | GTTGAGTACTCTGTTCTTGCTG     |
| <i>ERF2</i>      | AATTCGGTGAACCTGACCC        | ACGACGTAGAAGAGGACGAC       |
| <i>ERF5</i>      | CCGATGAAGGTGAGAAGAAAC      | GTCAACGCTCTGTTCCGTCT       |
| <i>ERF11</i>     | TAAGGCTGGGATGATGGTGT       | AAAACCACACGTCGTCCTTC       |
| <i>ERF105</i>    | CCGGTGGTTCAAGAGAATGAT      | CCTAACCCAGACACGAACACC      |
| <i>ERF109</i>    | CAGTTGAAGCAGAGCAATGG       | CCATTCCTCCAAAATCCATCATC    |

#### Specific primer sets used for chIP:

|                 | Forward                   | Reverse                   |
|-----------------|---------------------------|---------------------------|
| <i>WRKY18 c</i> | CAGCTTCTATGTCTTGTGTGC     | AAAGCTGTCTTCTATAAAGTCCAG  |
| <i>WRKY18 b</i> | CTGGACTTTATAGAAGACAGC     | AGATAGGTTTGGGATATGTTAGG   |
| <i>WRKY18 a</i> | CGACAGTAAATTTAACCCATGCAT  | ACACTGATTGGCTAAAAATATGGG  |
| <i>ERF2 c</i>   | CCCCTAACTAAAACAAATTTGG    | ATGTGGAAGGTGGTTAAGAGG     |
| <i>ERF2 b</i>   | GACATTGGCAATTAGGAAAATTCT  | ATAATTATATGAATGGGACACTG   |
| <i>ERF2 a</i>   | CCAAATCATTGGTGTACAAAAAG   | GGAGTAGTGAAATCATAGTGATA   |
| <i>SAUR67 c</i> | CTCTTCTTTCTCCACACTTTGC    | CTTCATAAGCTTCTTTGCGTTTATC |
| <i>SAUR67 b</i> | CAACCACAACCTTTCATTCAAAGAG | GGAGAGTTAAAGCTTGAGATTGG   |
| <i>SAUR67 a</i> | TTTACCTGATGGACTACTAACCAA  | AAGCCAAAAATACCAACTCATGC   |



## References

- 1 Bailey, T. L. & Elkan, C. Fitting a mixture model by expectation maximization to discover motifs in biopolymers. *Proc Int Conf Intell Syst Mol Biol* **2**, 28-36 (1994).
- 2 Gupta, S., Stamatoyannopoulos, J. A., Bailey, T. L. & Noble, W. S. Quantifying similarity between motifs. *Genome Biol* **8**, R24, doi:10.1186/gb-2007-8-2-r24 (2007).
